# Supplementary material for: Literacy Training of Kindergarten Children With Pencil, Keyboard or Tablet Stylus: The Influence of the Writing Tool on Reading and Writing Performance at the Letter and Word Level
Source: PubMed Central journal article supplement (PMC6987467; doi:10.3389/fpsyg.2019.03054), 2020-01-22
Supplement: Table_1.pdf [file Table_1.pdf]

# Literacy training of kindergarten children with pencil, keyboard or tablet stylus: The influence of the writing tool on reading and writing performance at the letter and word level

Carmen Mayer<sup>1,2</sup>, Stefanie Wallner<sup>1</sup>, Nora Budde-Spengler<sup>1,3</sup>, Sabrina Braunert<sup>1</sup>, Petra A. Arndt<sup>1§</sup>, and Markus Kiefer<sup>2\*§</sup>

<sup>1</sup>Transfer Centre for Neuroscience and Education (ZNL), Ulm University, Ulm, Germany

<sup>2</sup>Section for Cognitive Electrophysiology, Department of Psychiatry, Ulm University, Ulm, Germany

<sup>3</sup>Department of German studies, Catholic University of Eichstätt-Ingolstadt, Eichstätt, Germany

§Both authors contributed equally to this work

## Supplementary Material

### 1 Supplementary Tables

Supplementary Table 1.

*Results of the letter reading task at the different time points of assessment*

---

| Letter reading | T2                       | T3                       |
|----------------|--------------------------|--------------------------|
|                | Mean (SD)<br>[Min – Max] | Mean (SD)<br>[Min – Max] |
| Total          | 11.70 (4.31)<br>[1 – 16] | 11.91 (4.31)<br>[1 – 16] |
| Pencil         | 11.54 (4.17)<br>[2 – 16] | 11.73 (4.27)<br>[2 – 16] |
| Stylus         | 11.55 (4.08)<br>[2 – 16] | 11.75 (4.07)<br>[2 – 16] |
| Keyboard       | 12.00 (4.75)<br>[1 – 16] | 12.28 (4.66)<br>[1 – 16] |

---

*Note.* T2 = assessment after training; T3 = assessment 4-5 weeks after training;

Supplementary Table 2.

*Correlations of the dependent variables averaged across T2 and T3 with the control variables, separately for the different training groups*

| <b>Dependent variables</b> | <b>Control variables</b>     |               |                 |                                    |               |                 |
|----------------------------|------------------------------|---------------|-----------------|------------------------------------|---------------|-----------------|
|                            | <i>Letter reading<br/>T1</i> |               |                 | <i>Visuo-spatial skills<br/>T1</i> |               |                 |
|                            | <i>Pencil</i>                | <i>Stylus</i> | <i>Keyboard</i> | <i>Pencil</i>                      | <i>Stylus</i> | <i>Keyboard</i> |
| <i>Letter recognition</i>  | 0.32*                        | 0.11          | 0.22            | 0.55**                             | 0.25          | 0.08            |
| <i>Letter writing</i>      | 0.80**                       | 0.81**        | 0.81**          | 0.31*                              | 0.32*         | 0.37*           |
| <i>Word reading</i>        | 0.70**                       | 0.63**        | 0.77**          | 0.38**                             | 0.16          | 0.21            |
| <i>Word writing</i>        | 0.71**                       | 0.69**        | 0.70**          | 0.33*                              | 0.09          | 0.36*           |

*Note.* T1 = assessment before training; \* indicate a significant correlation with  $p < 0.05$ ; \*\* indicate a significant correlation with  $p < 0.01$ .

## Supplementary Table 3.

*Descriptive data of all dependent variables for the pencil group at the different time points of assessment*

| <b>Pencil group</b>                 | <b>T1</b>                         | <b>T2</b>                         | <b>T3</b>                         |
|-------------------------------------|-----------------------------------|-----------------------------------|-----------------------------------|
|                                     | Mean ( <i>SD</i> )<br>[Min – Max] | Mean ( <i>SD</i> )<br>[Min – Max] | Mean ( <i>SD</i> )<br>[Min – Max] |
| Letter recognition<br>(raw score)   | 7.00 (2.70)<br>[1 – 11]           | 8.58 (2.02)<br>[3 – 11]           | 8.53 (2.05)<br>[4 – 11]           |
| Letter writing<br>(raw score)       | 6.56 (4.50)<br>[0 – 16]           | 9.90 (4.17)<br>[1 – 16]           | 10.21 (4.17)<br>[2 – 16]          |
| Word reading<br>(raw score)         | -- <sup>1</sup>                   | 1.75 (1.80)<br>[0 – 5]            | 1.76 (2.02)<br>[0 – 5]            |
| Word writing<br>(raw score in %)    | -- <sup>1</sup>                   | 49.27 (33.00)<br>[0 – 100]        | 52.00 (36.00)<br>[4 – 100]        |
| Visuo-spatial skills<br>(raw score) | 15.27 (5.57)<br>[5 – 25]          | 17.35 (5.02)<br>[6 – 24]          | -- <sup>2</sup>                   |

*Note.* . T1 = assessment before training; T2 = assessment after training; T3 = assessment 4-5 weeks after training; --<sup>1</sup>: variable was not quantified at T1; --<sup>2</sup>: variable was not quantified at T3.

## Supplementary Table 4.

*Descriptive data of all dependent variables for the stylus group at the different time points of assessment*

| Stylus group                        | T1                       | T2                         | T3                         |
|-------------------------------------|--------------------------|----------------------------|----------------------------|
|                                     | Mean (SD)<br>[Min – Max] | Mean (SD)<br>[Min – Max]   | Mean (SD)<br>[Min – Max]   |
| Letter recognition<br>(raw score)   | 7.13 (2.19)<br>[1 – 10]  | 8.51 (2.04)<br>[3 – 11]    | 8.41 (2.14)<br>[4 – 11]    |
| Letter writing<br>(raw score)       | 6.20 (3.06)<br>[0 – 12]  | 9.77 (3.68)<br>[3 – 15]    | 9.93 (3.90)<br>[1 – 16]    |
| Word reading<br>(raw score)         | -- <sup>1</sup>          | 1.17 (1.56)<br>[0 – 5]     | 1.21 (1.50)<br>[0 – 5]     |
| Word writing<br>(raw score in %)    | -- <sup>1</sup>          | 41.94 (28.71)<br>[0 – 100] | 48.23 (30.14)<br>[0 – 100] |
| Visuo-spatial skills<br>(raw score) | 15.96 (5.05)<br>[5 – 23] | 17.57 (4.12)<br>[5 – 25]   | -- <sup>2</sup>            |

*Note.* . T1 = assessment before training; T2 = assessment after training; T3 = assessment 4-5 weeks after training; --<sup>1</sup>: variable was not quantified at T1; --<sup>2</sup>: variable was not quantified at T3.

Supplementary Table 5.

*Descriptive data of all dependent variables for the keyboard group at the different time points of assessment*

| <b>Keyboard group</b>               | <b>T1</b>                         | <b>T2</b>                         | <b>T3</b>                         |
|-------------------------------------|-----------------------------------|-----------------------------------|-----------------------------------|
|                                     | Mean ( <i>SD</i> )<br>[Min – Max] | Mean ( <i>SD</i> )<br>[Min – Max] | Mean ( <i>SD</i> )<br>[Min – Max] |
| Letter recognition<br>(raw score)   | 7.13 (2.02)<br>[2 – 11]           | 8.00 (2.22)<br>[3 – 11]           | 7.48 (2.01)<br>[2 – 11]           |
| Letter writing<br>(raw score)       | 7.74 (4.49)<br>[0 – 15]           | 11.76 (4.19)<br>[2 – 16]          | 11.27 (4.32)<br>[1 – 16]          |
| Word reading<br>(raw score)         | -- <sup>1</sup>                   | 1.98 (1.85)<br>[0 – 5]            | 2.26 (1.88)<br>[0 – 5]            |
| Word writing<br>(raw score in %)    | -- <sup>1</sup>                   | 56.78 (34.66)<br>[0 – 100]        | 58.83 (34.16)<br>[0 – 100]        |
| Visuo-spatial skills<br>(raw score) | 16.11 (4.76)<br>[5 – 24]          | 16.15 (4.57)<br>[4 – 22]          | -- <sup>2</sup>                   |

*Note.* . T1 = assessment before training; T2 = assessment after training; T3 = assessment 4-5 weeks after training; --<sup>1</sup>: variable was not quantified at T1; --<sup>2</sup>: variable was not quantified at T3.

## Supplementary Table 6.

*Results of estimated LMMs for the variable letter recognition (T1 vs. T2)*

|                                  | <b>Estimate<br/>(SE)</b> | <b>df</b> | <b>t-Score</b> | <b>p-Value</b> | <b>CI 95%</b> |              |
|----------------------------------|--------------------------|-----------|----------------|----------------|---------------|--------------|
|                                  |                          |           |                |                | <b>Lower</b>  | <b>Upper</b> |
| <b>Reference: pencil group</b>   |                          |           |                |                |               |              |
| Intercept                        | 7.06 (.30)               | 274.26    | 23.27          | <.001          | 6.46          | 7.65         |
| T3 (Reference=T1)                | 1.56 (.41)               | 141.60    | 3.78           | <.001          | .74           | 2.37         |
| Stylus group                     | .10 (.43)                | 274.11    | .23            | .821           | -.75          | .94          |
| Keyboard group                   | -.02 (.43)               | 274.13    | -.04           | .968           | -.87          | .83          |
| Visuo-spatial skills (at T1)     | .06 (.03)                | 139.35    | 2.20           | .029           | .01           | .11          |
| Letter reading (at T1)           | .11 (.03)                | 139.33    | 4.11           | <.001          | .06           | .16          |
| T3 * stylus group                | -.20 (.58)               | 140.87    | -.34           | .738           | -1.35         | .96          |
| T3 * keyboard group              | -.71 (.59)               | 140.88    | -1.21          | .230           | -1.87         | .45          |
| <b>Reference: keyboard group</b> |                          |           |                |                |               |              |
| Intercept                        | 7.04 (.31)               | 274.08    | 22.95          | <.001          | 6.43          | 7.64         |
| T3 (Reference=T1)                | .58 (.42)                | 140.18    | 2.03           | .044           | .02           | 1.68         |
| Stylus group                     | .11 (.43)                | 274.02    | .27            | .791           | -.74          | .96          |
| Pencil group                     | -.02 (.43)               | 274.13    | .04            | .968           | -.83          | .87          |
| Visuo-spatial skills (at T1)     | .06 (.03)                | 139.35    | 2.20           | .029           | .01           | .11          |
| Letter reading (at T1)           | .11 (.03)                | 139.33    | 4.11           | <.001          | .06           | .16          |
| T3 * stylus group                | .51 (.59)                | 140.17    | .87            | .386           | -.65          | 1.68         |
| T3 * pencil group                | .71 (.59)                | 140.88    | 1.21           | .230           | -.45          | 1.87         |

## Supplementary Table 7.

*Results of estimated LMMs for the variable letter recognition (T2 vs T3)*

|                                  | <b>Estimate<br/>(SE)</b> | <b>df</b> | <b>t-Score</b> | <b>p-Value</b> | <b>CI 95%</b> |              |
|----------------------------------|--------------------------|-----------|----------------|----------------|---------------|--------------|
|                                  |                          |           |                |                | <b>Lower</b>  | <b>Upper</b> |
| <b>Reference: pencil group</b>   |                          |           |                |                |               |              |
| Intercept                        | 8.63 (0.29)              | 224.57    | 29.97          | <.001          | 8.07          | 9.20         |
| T3 (Reference=T2)                | -0.05 (.30)              | 133.67    | -.17           | .867           | -.64          | .54          |
| Stylus group                     | -0.16 (.41)              | 222.89    | -.40           | .693           | -.97          | .65          |
| Keyboard group                   | -0.72 (.41)              | 224.50    | -1.74          | .083           | -1.53         | .09          |
| Visuo-spatial skills (at T1)     | .10 (.03)                | 140.00    | 3.15           | .002           | .04           | .16          |
| Letter reading (at T1)           | .05 (.03)                | 139.21    | 1.56           | .121           | -.01          | .11          |
| T3 * stylus group                | -.30 (.56)               | 134.88    | -.26           | .799           | -.96          | .74          |
| T3 * keyboard group              | -1.15 (.56)              | 135.59    | -1.00          | .319           | -1.28         | .42          |
| <b>Reference: keyboard group</b> |                          |           |                |                |               |              |
| Intercept                        | 7.92 (.29)               | 224.83    | 26.85          | <.001          | 7.34          | 8.50         |
| T3 (Reference=T2)                | -.48 (.31)               | 137.34    | -1.55          | .125           | -1.10         | .13          |
| Stylus group                     | .56 (.42)                | 223.31    | 1.34           | .182           | -.26          | 1.38         |
| Pencil group                     | .72 (.41)                | 224.50    | 1.74           | .083           | -.09          | 1.53         |
| Visuo-spatial skills (at T1)     | .10 (.03)                | 140.00    | 3.15           | .002           | .04           | .16          |
| Letter reading (at T1)           | .05 (.03)                | 139.21    | 1.56           | .121           | -.01          | .11          |
| T3 * stylus group                | .32 (.44)                | 136.70    | .73            | .464           | -.55          | 1.19         |
| T3 * pencil group                | .43 (.43)                | 135.59    | 1.00           | .319           | -.42          | 1.28         |

## Supplementary Table 8.

*Results of estimated LMMs for the variable letter writing (T1 vs. T2)*

|                                  | <b>Estimate<br/>(SE)</b> | <b>df</b> | <b>t-Score</b> | <b>p-Value</b> | <b>CI 95%</b> |              |
|----------------------------------|--------------------------|-----------|----------------|----------------|---------------|--------------|
|                                  |                          |           |                |                | <b>Lower</b>  | <b>Upper</b> |
| <b>Reference: pencil group</b>   |                          |           |                |                |               |              |
| Intercept                        | 6.90 (.32)               | 257.47    | 21.45          | <.001          | 6.27          | 7.53         |
| T2 (Reference=T1)                | 3.37 (.39)               | 139.95    | 8.69           | <.001          | 2.61          | 4.14         |
| Stylus group                     | -.10 (.45)               | 256.61    | -.22           | .828           | -.99          | .79          |
| Keyboard group                   | .37 (.46)                | 257.44    | .81            | .420           | -.54          | 1.28         |
| Visuo-spatial skills (at T1)     | .04 (.03)                | 139.45    | 1.42           | .157           | -.02          | .10          |
| Letter reading (at T1)           | .66 (.03)                | 139.12    | 21.20          | <.001          | .59           | .72          |
| T2 * stylus group                | .30 (.55)                | 139.94    | .55            | .584           | -.78          | 1.39         |
| T2 * keyboard group              | .62 (.56)                | 140.01    | 1.12           | .263           | -.47          | 1.72         |
| <b>Reference: keyboard group</b> |                          |           |                |                |               |              |
| Intercept                        | 7.27 (.33)               | 257.45    | 22.11          | <.001          | 6.62          | 7.92         |
| T2 (Reference=T1)                | 4.00 (.40)               | 140.07    | 10.07          | <.001          | 3.21          | 4.78         |
| Stylus group                     | .47 (.46)                | 256.53    | -1.03          | .306           | -1.37         | .43          |
| Pencil group                     | -.37 (.46)               | 257.44    | -.81           | .420           | -1.28         | .54          |
| Visuo-spatial skills (at T1)     | .04 (.03)                | 139.45    | 1.42           | .157           | -.02          | .105         |
| Letter reading (at T1)           | .66 (.03)                | 139.12    | 21.20          | <.001          | .59           | .72          |
| T2 * stylus group                | -.32 (.56)               | 139.99    | -.58           | .563           | -1.42         | .78          |
| T2 * pencil group                | -.62 (.56)               | 140.01    | -1.12          | .263           | -1.72         | .475         |



## Supplementary Table 9.

*Results of estimated LMMs for the variable letter writing (T2 vs. T3)*

|                                  | <b>Estimate<br/>(SE)</b> | <b>df</b> | <b>t-Score</b> | <b>p-Value</b> | <b>CI 95%</b> |              |
|----------------------------------|--------------------------|-----------|----------------|----------------|---------------|--------------|
|                                  |                          |           |                |                | <b>Lower</b>  | <b>Upper</b> |
| <b>Reference: pencil group</b>   |                          |           |                |                |               |              |
| Intercept                        | 10.25 (.37)              | 169.53    | 27.56          | <.001          | 9.52          | 10.99        |
| T3 (Reference=T2)                | .16 (.24)                | 129.85    | .63            | .528           | -.33          | .64          |
| Stylus group                     | .10 (.53)                | 169.53    | .19            | .852           | -.95          | 1.14         |
| Keyboard group                   | 1.13 (.53)               | 169.48    | 2.12           | .035           | .08           | 2.18         |
| Visuo-spatial skills (at T1)     | .09 (.04)                | 139.35    | 2.22           | .028           | .01           | .18          |
| Letter reading (at T1)           | .60 (.04)                | 137.80    | 14.04          | <.001          | .51           | .68          |
| T3 * stylus group                | -.09 (.35)               | 130.73    | -.24           | .808           | -.79          | .61          |
| T3 * keyboard group              | -.47 (.35)               | 130.46    | -1.33          | .185           | -1.17         | .23          |
| <b>Reference: keyboard group</b> |                          |           |                |                |               |              |
| Intercept                        | 11.38 (.38)              | 169.68    | 29.93          | <.001          | 10.63         | 12.13        |
| T3 (Reference=T2)                | -.32 (.26)               | 131.02    | -1.24          | .217           | -.82          | .19          |
| Stylus group                     | -1.03 (.44)              | 169.65    | -1.93          | .056           | -2.09         | .03          |
| Pencil group                     | -1.13 (.44)              | 169.48    | -2.12          | .035           | -2.18         | -.08         |
| Visuo-spatial skills (at T1)     | .09 (.04)                | 139.35    | 2.22           | .028           | .010          | .18          |
| Letter reading (at T1)           | .60 (.04)                | 137.80    | 14.04          | <.001          | .51           | .68          |
| T3 * stylus group                | .39 (.36)                | 131.29    | 1.07           | .287           | -.33          | 1.10         |
| T3 * pencil group                | .47 (.35)                | 130.46    | 1.33           | .185           | -.23          | 1.17         |

## Supplementary Table 10.

*Results of estimated LMMs for the variable letter writing (T1 vs. T3)*

|                                  | <b>Estimate<br/>(SE)</b> | <b>df</b> | <b>t-Score</b> | <b>p-Value</b> | <b>CI 95%</b> |              |
|----------------------------------|--------------------------|-----------|----------------|----------------|---------------|--------------|
|                                  |                          |           |                |                | <b>Lower</b>  | <b>Upper</b> |
| <b>Reference: pencil group</b>   |                          |           |                |                |               |              |
| Intercept                        | 6.90 (.33)               | 245.63    | 20.61          | <.001          | 6.24          | 7.56         |
| T3 (Reference=T1)                | 3.55 (.39)               | 137.12    | 9.19           | <.001          | 2.78          | 4.31         |
| Stylus group                     | -.10 (.47)               | 244.55    | -.21           | .838           | -1.03         | .83          |
| Keyboard group                   | .38 (.48)                | 245.64    | .80            | .425           | -.56          | 1.33         |
| Visuo-spatial skills (at T1)     | .05 (.03)                | 147.03    | 1.51           | .133           | -.02          | .12          |
| Letter reading (at T1)           | .65 (.03)                | 141.84    | 19.68          | <.001          | .59           | .72          |
| T3 * stylus group                | .26 (.55)                | 139.10    | .48            | .632           | -.83          | 1.36         |
| T3 * keyboard group              | .18 (.56)                | 138.60    | .33            | .745           | -.92          | 1.28         |
| <b>Reference: keyboard group</b> |                          |           |                |                |               |              |
| Intercept                        | 7.28 (.34)               | 245.63    | 21.27          | <.001          | 6.60          | 7.95         |
| T3 (Reference=T1)                | 3.73 (.40)               | 140.05    | 9.31           | <.001          | 2.94          | 4.52         |
| Stylus group                     | -.48 (.48)               | 244.47    | -1.00          | .316           | -1.42         | .46          |
| Pencil group                     | -.38 (.48)               | 245.64    | -.80           | .425           | -1.33         | .56          |
| Visuo-spatial skills (at T1)     | .05 (.03)                | 147.03    | 1.51           | .133           | -.02          | .12          |
| Letter reading (at T1)           | .65 (.03)                | 141.84    | 19.68          | <.001          | .59           | .72          |
| T3 * stylus group                | .08 (.56)                | 140.46    | .15            | .882           | -1.03         | 1.20         |
| T3 * pencil group                | -.18 (.56)               | 138.60    | -.33           | .745           | -1.28         | .92          |

Supplementary Table 11.

*Results of estimated LMMs for the variable word writing (T2 vs. T3)*

|                                  | <b>Estimate<br/>(SE)</b> | <b>df</b> | <b>t-Score</b> | <b>p-Value</b> | <b>CI 95%</b> |              |
|----------------------------------|--------------------------|-----------|----------------|----------------|---------------|--------------|
|                                  |                          |           |                |                | <b>Lower</b>  | <b>Upper</b> |
| <b>Reference: pencil group</b>   |                          |           |                |                |               |              |
| Intercept                        | 49.29 (3.43)             | 163.77    | 14.37          | <.001          | 42.51         | 56.06        |
| T3 (Reference=T2)                | 3.42 (1.96)              | 132.85    | 1.74           | .084           | -.46          | 7.31         |
| Stylus group                     | -5.62 (4.88)             | 162.89    | -1.15          | .251           | -15.25        | 4.01         |
| Keyboard group                   | 3.75 (4.91)              | 163.79    | .76            | .446           | -5.94         | 13.44        |
| Visuo-spatial skills (at T1)     | .37 (.40)                | 141.07    | .92            | .360           | -.42          | 1.16         |
| Letter reading (at T1)           | 4.33 (.40)               | 139.39    | 10.89          | <.001          | 3.54          | 5.11         |
| T3 * stylus group                | 2.65 (2.84)              | 133.49    | .93            | .352           | -2.96         | 8.26         |
| T3 * keyboard group              | 1.38 (2.85)              | 133.59    | .48            | .629           | -4.26         | 7.03         |
| <b>Reference: keyboard group</b> |                          |           |                |                |               |              |
| Intercept                        | 53.04 (3.51)             | 163.89    | 15.13          | <.001          | 46.11         | 59.96        |
| T3 (Reference=T2)                | 4.80 (2.07)              | 134.24    | 2.32           | .022           | .71           | 8.90         |
| Stylus group                     | -9.37 (4.93)             | 162.92    | -1.90          | .059           | -19.11        | .37          |
| Pencil group                     | -3.75 (4.91)             | 163.79    | -.76           | .446           | -13.44        | 5.94         |
| Visuo-spatial skills (at T1)     | .37 (.40)                | 141.07    | .92            | .360           | -.42          | 1.16         |
| Letter reading (at T1)           | 4.33 (.40)               | 139.39    | 10.90          | <.001          | 3.54          | 5.11         |
| T3 * stylus group                | 1.27 (2.91)              | 134.15    | .44            | .664           | -4.49         | 7.03         |
| T3 * pencil group                | -1.38 (2.85)             | 133.59    | -.48           | .629           | -7.03         | 4.26         |

Supplementary Table 12.

*Results of estimated LMMs for the variable word reading (T2 vs. T3)*

|                                  | <b>Estimate<br/>(SE)</b> | <b>df</b> | <b>t-Score</b> | <b>p-Value</b> | <b>CI 95%</b> |              |
|----------------------------------|--------------------------|-----------|----------------|----------------|---------------|--------------|
|                                  |                          |           |                |                | <b>Lower</b>  | <b>Upper</b> |
| <b>Reference: pencil group</b>   |                          |           |                |                |               |              |
| Intercept                        | 1.78 (.18)               | 183.70    | 9.62           | <.001          | 1.41          | 2.14         |
| T3 (Reference=T1)                | -.003 (.14)              | 131.26    | -.02           | .981           | -.30          | .28          |
| Stylus group                     | -.47 (.26)               | 182.39    | -1.81          | .072           | -.99          | .04          |
| Keyboard group                   | -.02 (.26)               | 181.95    | -.07           | .948           | -.54          | .50          |
| Visuo-spatial skills (at T1)     | .01 (.02)                | 139.76    | .59            | .559           | -.03          | .05          |
| Letter reading (at T1)           | .30 (.03)                | 137.84    | 11.72          | <.001          | .25           | .35          |
| T3 * stylus group                | .06 (.21)                | 132.33    | .31            | .760           | -.34          | .47          |
| T3 * keyboard group              | .36 (.21)                | 132.46    | 1.74           | .085           | -.05          | .77          |
| <b>Reference: keyboard group</b> |                          |           |                |                |               |              |
| Intercept                        | 1.76 (.19)               | 180.90    | 9.34           | <.001          | 1.39          | 2.13         |
| T3 (Reference=T1)                | .36 (.15)                | 133.55    | 2.37           | .019           | .06           | .66          |
| Stylus group                     | -.46 (.26)               | 180.75    | -1.72          | .086           | -.97          | .07          |
| Pencil group                     | .02 (.26)                | 181.95    | .07            | .948           | -.50          | .54          |
| Visuo-spatial skills (at T1)     | .01 (.02)                | 139.76    | .59            | .559           | -.03          | .05          |
| Letter reading (at T1)           | .30 (.03)                | 137.84    | 11.72          | <.001          | .25           | .35          |
| T3 * stylus group                | -.30 (.21)               | 133.47    | -1.41          | .160           | -.72          | .12          |
| T3 * pencil group                | -.36 (.21)               | 132.46    | -1.74          | .085           | -.77          | .05          |
